# Supplementary material for: Prevalence of SARS-CoV-2 antibodies in hospital employees, Central Germany
Source: publisher site journal article supplement (doi:10.1515/labmed-2021-0107), 2021-12-15
Supplement: Supplementary file 1 [file j_labmed-2021-0107_suppl_001.xlsx]

## Sheet: measurements-20211101
number	S1 IgG result	S1 ratio	NCP total Ab result	NCP COI
1	negative	0.6	positive	1.41
2	negative	0.2	positive	1.02
3	negative	0.2	positive	1.56
4	negative	0.2	positive	1.18
5	negative	0.1	positive	2.12
6	negative	0.5	positive	1.09
7	negative	0.1	positive	2.99
8	positive	1.4	negative	0.11
9	positive	1.5	negative	0.06
10	positive	1.6	negative	0.1
11	positive	1.1	negative	0.06
12	positive	0.9	negative	0.06
13	positive	1.6	negative	0.07
14	positive	2	negative	0.07
15	positive	0.9	negative	0.06
16	positive	0.9	negative	0.39
17	positive	0.9	negative	0.06
18	positive	1	negative	0.07
19	positive	0.9	negative	0.06
20	positive	1.4	negative	0.07
21	positive	0.9	negative	0.06
22	positive	0.9	negative	0.06
23	positive	1.3	negative	0.07
24	positive	0.9	negative	0.07
25	positive	1.9	negative	0.07
26	positive	1.1	negative	0.06
27	positive	0.9	negative	0.06
28	positive	1.2	negative	0.06
29	positive	0.9	negative	0.07
30	positive	1.4	negative	0.07
31	positive	1	negative	0.07
32	positive	1.1	negative	0.07
33	positive	1.1	negative	0.07
34	positive	1.2	negative	0.06
35	positive	1.2	negative	0.06
36	positive	1.7	negative	0.05
37	positive	1.2	negative	0.05
38	positive	3.3	negative	0.15
39	positive	1	negative	0.06
40	positive	1.2	negative	0.14
41	positive	1.2	negative	0.07
42	positive	1.4	negative	0.06
43	positive	1.3	negative	0.08
44	positive	1.4	negative	0.06
45	positive	2.2	negative	0.07
46	positive	0.9	negative	0.07
47	positive	1.7	negative	0.11
48	positive	1	negative	0.05
49	positive	0.9	negative	0.06
50	positive	1.2	negative	0.06
51	positive	1.6	negative	0.06
52	positive	2.2	negative	0.06
53	positive	0.9	negative	0.06
54	positive	1.1	negative	0.07
55	positive	1.9	negative	0.08
56	positive	1.1	negative	0.07
57	positive	1	negative	0.08
58	positive	1.2	negative	0.05
59	positive	1	negative	0.12
60	positive	1.2	negative	0.06
61	positive	0.9	negative	0.06
62	positive	1.2	negative	0.06
63	positive	1.1	negative	0.06
64	positive	0.9	negative	0.05
65	positive	0.9	negative	0.06
66	positive	1.3	negative	0.06
67	positive	0.9	negative	0.07
68	positive	1	negative	0.06
69	positive	1.3	negative	0.06
70	positive	1	negative	0.06
71	positive	1	negative	0.06
72	positive	1.4	negative	0.07
73	positive	1.2	negative	0.1
74	positive	1.2	negative	0.06
75	positive	1.9	negative	0.06
76	positive	1.3	negative	0.06
77	positive	1	negative	0.06
78	positive	1.6	negative	0.07
79	positive	1.4	negative	0.06
80	positive	0.9	negative	0.07
81	positive	1.3	negative	0.06
82	positive	1	negative	0.08
83	positive	1.2	negative	0.05
84	positive	0.9	negative	0.07
85	positive	1.4	negative	0.06
86	positive	0.9	negative	0.07
87	positive	0.9	negative	0.06
88	positive	1.2	negative	0.07
89	positive	1.9	negative	0.07
90	positive	14	positive	67.15
91	positive	12.4	positive	69.86
92	positive	9.6	positive	87.89
93	positive	2.4	positive	10.26
94	positive	5.7	positive	83.26
95	positive	7	positive	104
96	positive	4.3	positive	40.52
97	positive	2.5	positive	37.51
98	positive	8.7	positive	114.6
99	positive	9	positive	89.77
100	positive	2.6	positive	100.2
101	positive	9.8	positive	48.96
102	positive	9.1	positive	110.7
